# Supplementary material for: [4]Helicene-based anions in electrocrystallization with tetrachalcogeno-fulvalene donors
Source: Royal Society of Chemistry journal article supplement (doi:10.1039/d2ce00091a), 2022-01-01
Supplement: d2ce00091a1.pdf [file d2ce00091a1.pdf]

Supporting information for

**[4]Helicene based anions in electrocrystallization with  
tetrachalcogenafulvalene donors**

Nicolas Zigon<sup>\*a</sup> and Narcis Avarvari <sup>\*a</sup>

<sup>a</sup> Univ Angers, CNRS, MOLTECH-Anjou, SFR MATRIX, F-49000 Angers, France.

E-mail: [nicolas.zigon@univ-angers.fr](mailto:nicolas.zigon@univ-angers.fr), [narcis.avarvari@univ-angers.fr](mailto:narcis.avarvari@univ-angers.fr)

## SUMMARY

**Table S1:** Crystallographic data, details of data collection and structure refinement parameters.

**Table S2.** Selected bond distances for compounds **2** and **TMTTF-(2)**<sub>2</sub>.

**Table S3.** Selected bond distances (Å) for compound **(TMTTF)<sub>2</sub>([4]heliceneSO<sub>3</sub>)<sub>2</sub>**.

**Table S4.** Selected bond distances (Å) for compound **(TMTSF)<sub>5</sub>([4]heliceneSO<sub>3</sub>)<sub>5</sub>**.

**Table S5.** Selected bond distances (Å) for compound **(BEDT-TTF)<sub>2</sub>([4]heliceneSO<sub>3</sub>)**.

## X-Ray structure determinations

Details about data collection and solution refinement are given in Table S1. Data collections were performed on a Rigaku Oxford Diffraction SuperNova diffractometer equipped with an Atlas CCD detector and micro-focus Cu-K $\alpha$  radiation ( $\lambda = 1.54184 \text{ \AA}$ ). The structures were solved by intrinsic phasing and refined on  $F^2$  by full matrix least-squares techniques with SHELX programs (SHELXT 2018/2 and SHELXL 2018/3)<sup>1,2</sup> using the ShelXle and the Olex2 graphical user interfaces.<sup>3,4</sup> All non-H atoms were refined anisotropically and absorption was corrected by multiscan empirical absorption using spherical harmonics with CrysAlisPro program for **2**, **TMTTF-(2)<sub>2</sub>**, **(TMTTF)<sub>2</sub>([4]heliceneSO<sub>3</sub>)<sub>2</sub>**, **(TMTSF)<sub>5</sub>([4]heliceneSO<sub>3</sub>)<sub>5</sub>**, and **(BEDT-TTF)<sub>2</sub>([4]heliceneSO<sub>3</sub>)**. The H atoms were placed at calculated positions and refined using a riding model. Crystallographic data for the five structures have been deposited with the Cambridge Crystallographic Data Centre, deposition numbers CCDC 2142732 for **2**, 2142733 for **TMTTF-(2)<sub>2</sub>**, 2142734 for **(TMTTF)<sub>2</sub>([4]heliceneSO<sub>3</sub>)<sub>2</sub>**, 2142735 for **(TMTSF)<sub>5</sub>([4]heliceneSO<sub>3</sub>)<sub>5</sub>**, 2142736 for **(BEDT-TTF)<sub>2</sub>([4]heliceneSO<sub>3</sub>)**. These data can be obtained free of charge from CCDC, 12 Union road, Cambridge CB2 1EZ, UK (e-mail: deposit@ccdc.cam.ac.uk or <http://www.ccdc.cam.ac.uk>).

|                                                                                                             | <b>2</b>                                       | <b>TMETF-(2)<sub>2</sub></b>                                  | <b>(TMETF)<sub>2</sub></b><br><b>([4]heliceneSO<sub>3</sub>)<sub>2</sub></b> | <b>(TMTSF)<sub>5</sub></b><br><b>([4]heliceneSO<sub>3</sub>)<sub>5</sub></b>                                                       | <b>(BEDT-TTF)<sub>2</sub></b><br><b>([4]heliceneSO<sub>3</sub>)</b>                     |
|-------------------------------------------------------------------------------------------------------------|------------------------------------------------|---------------------------------------------------------------|------------------------------------------------------------------------------|------------------------------------------------------------------------------------------------------------------------------------|-----------------------------------------------------------------------------------------|
| Formula sum                                                                                                 | C <sub>19</sub> H <sub>12</sub> O <sub>2</sub> | C <sub>48</sub> H <sub>34</sub> O <sub>4</sub> S <sub>4</sub> | C <sub>56</sub> H <sub>46</sub> O <sub>6</sub> S <sub>10</sub>               | C <sub>145</sub> H <sub>123.40</sub> Cl <sub>1.20</sub> N <sub>2.50</sub><br>O <sub>15.89</sub> S <sub>5.60</sub> Se <sub>20</sub> | C <sub>38</sub> H <sub>27.62</sub> Cl <sub>2.01</sub> O <sub>4.31</sub> S <sub>18</sub> |
| Formula weight                                                                                              | 272.29                                         | 802.99                                                        | 1135.53                                                                      | 3956.37                                                                                                                            | 1201.70                                                                                 |
| Crystal system                                                                                              | monoclinic                                     | orthorhombic                                                  | monoclinic                                                                   | triclinic                                                                                                                          | triclinic                                                                               |
| Space group                                                                                                 | <i>P</i> <sub>2</sub> <sub>1</sub> / <i>c</i>  | <i>P</i> bcn                                                  | <i>P</i> <sub>2</sub> <sub>1</sub> / <i>n</i>                                | <i>P</i> -1                                                                                                                        | <i>P</i> -1                                                                             |
| <i>a</i> /Å                                                                                                 | 15.8603(15)                                    | 14.0945(2)                                                    | 12.5199(9)                                                                   | 11.9706(5)                                                                                                                         | 12.7324(14)                                                                             |
| <i>b</i> /Å                                                                                                 | 3.7729(4)                                      | 12.8991(2)                                                    | 21.0758(15)                                                                  | 17.1872(7)                                                                                                                         | 12.7345(13)                                                                             |
| <i>c</i> /Å                                                                                                 | 22.243(2)                                      | 20.6753(3)                                                    | 19.3165(10)                                                                  | 35.0341(7)                                                                                                                         | 16.3097(11)                                                                             |
| <i>α</i> /°                                                                                                 | 90                                             | 90                                                            | 90                                                                           | 85.381(2)                                                                                                                          | 81.224(7)                                                                               |
| <i>β</i> /°                                                                                                 | 102.306(10)                                    | 90                                                            | 102.089(6)                                                                   | 82.114(3)                                                                                                                          | 78.147(7)                                                                               |
| <i>γ</i> /°                                                                                                 | 90                                             | 90                                                            | 90                                                                           | 76.022(4)                                                                                                                          | 64.043(10)                                                                              |
| <i>V</i> /Å <sup>3</sup>                                                                                    | 1300.4(2)                                      | 3758.61(11)                                                   | 4984.0(6)                                                                    | 6920.0(4)                                                                                                                          | 2321.1(4)                                                                               |
| <i>Z</i>                                                                                                    | 4                                              | 4                                                             | 4                                                                            | 2                                                                                                                                  | 2                                                                                       |
| <i>D<sub>c</sub></i> /g cm <sup>-3</sup>                                                                    | 1.391                                          | 1.419                                                         | 1.513                                                                        | 1.899                                                                                                                              | 1.719                                                                                   |
| T/K                                                                                                         | 149.4(4)                                       | 150.00(10)                                                    | 150.01(10)                                                                   | 150.01(10)                                                                                                                         | 150.00(10)                                                                              |
| <i>μ</i> /mm <sup>-1</sup>                                                                                  | 0.71                                           | 2.71                                                          | 4.54                                                                         | 7.62                                                                                                                               | 9.20                                                                                    |
| Reflections collected                                                                                       | 4016                                           | 28205                                                         | 18505                                                                        | 26058                                                                                                                              | 16438                                                                                   |
| Independent reflection                                                                                      | 2057[R <sub>int</sub> = 0.0476]                | 3607[R <sub>int</sub> = 0.0402]                               | 6502[R <sub>int</sub> = 0.0626]                                              | 21322[R <sub>int</sub> = 0.0444]                                                                                                   | 7236[R <sub>int</sub> = 0.0384]                                                         |
| final <i>R</i> <sub>1</sub> <sup>a</sup> , <i>wR</i> <sub>2</sub> <sup>b</sup> [ <i>I</i> > 2σ( <i>I</i> )] | 0.0976/0.2849                                  | 0.0424/0.1186                                                 | 0.0952/0.2419                                                                | 0.0641/0.1688                                                                                                                      | 0.0861/0.2312                                                                           |
| <i>R</i> <sub>1</sub> <sup>a</sup> , <i>wR</i> <sub>2</sub> <sup>b</sup> (all data)                         | 0.1104/0.2961                                  | 0.0452/0.1217                                                 | 0.1446/0.2851                                                                | 0.0775/0.1812                                                                                                                      | 0.1070/0.2488                                                                           |
| goodness-of-fit on <i>F</i> <sup>2</sup>                                                                    | 1.104                                          | 1.056                                                         | 1.066                                                                        | 1.063                                                                                                                              | 1.056                                                                                   |
| <i>Δρ</i> <sub>min</sub> / <i>Δρ</i> <sub>max</sub> (e Å <sup>-3</sup> )                                    | -0.34/0.39                                     | -0.26/0.43                                                    | -0.57/1.2                                                                    | -1.3/1.2                                                                                                                           | -0.79/1.69                                                                              |
| Completeness (%)                                                                                            | 99.8                                           | 99.97                                                         | 98.6                                                                         | 98.6                                                                                                                               | 98.6                                                                                    |
| CCDC number                                                                                                 | 2142732                                        | 2142733                                                       | 2142734                                                                      | 2142735                                                                                                                            | 2142736                                                                                 |

<sup>a</sup>*R*<sub>1</sub> = Σ||*F*<sub>o</sub>| - |*F*<sub>c</sub>|| / Σ|*F*<sub>o</sub>|. <sup>b</sup>*wR*<sub>2</sub> = [Σ*w*(*F*<sub>o</sub><sup>2</sup> - *F*<sub>c</sub><sup>2</sup>)<sup>2</sup> / Σ*w*(*F*<sub>o</sub><sup>2</sup>)<sup>2</sup>]<sup>1/2</sup>; *w* = 1/[σ<sup>2</sup>(*F*<sub>o</sub><sup>2</sup>) + (*aP*)<sup>2</sup> + *bP*] where *P* = [max(*F*<sub>o</sub><sup>2</sup>, 0) + 2*F*<sub>c</sub><sup>2</sup>]/3.

**Table S1** : Crystallographic data, details of data collection and structure refinement parameters.

| <b>2</b> |     |          | <b>TMTTF-(2)<sub>2</sub></b> |      |            |
|----------|-----|----------|------------------------------|------|------------|
| C1       | C2  | 1.366(7) | S001                         | C009 | 1.8162(17) |
| C1       | C6  | 1.411(7) | S001                         | C00C | 1.7684(17) |
| C2       | C3  | 1.403(7) | S002                         | C009 | 1.8101(16) |
| C3       | C4  | 1.375(8) | S002                         | C00B | 1.7633(16) |
| C4       | C5  | 1.412(8) | O003                         | C007 | 1.3652(19) |
| C5       | C6  | 1.425(6) | O003                         | C009 | 1.4487(19) |
| C5       | C7  | 1.426(8) | O004                         | C007 | 1.206(2)   |
| C6       | C10 | 1.461(7) | C005                         | C006 | 1.405(2)   |
| C7       | C8  | 1.340(8) | C005                         | C00D | 1.451(3)   |
| C8       | C9  | 1.425(7) | C005                         | C00H | 1.429(2)   |
| C10      | C14 | 1.443(7) | C006                         | C008 | 1.380(2)   |
| C10      | C9  | 1.408(7) | C007                         | C008 | 1.475(2)   |
| C11      | C12 | 1.354(8) | C008                         | C00F | 1.410(2)   |
| C11      | C9  | 1.434(8) | C009                         | C009 | 1.559(3)   |
| C12      | C13 | 1.425(7) | C00A                         | C00D | 1.451(3)   |
| C13      | C14 | 1.433(7) | C00A                         | C00G | 1.410(3)   |
| C13      | C15 | 1.408(7) | C00A                         | C00L | 1.428(3)   |
| C14      | C18 | 1.415(6) | C00B                         | C00C | 1.326(3)   |
| C15      | C16 | 1.363(7) | C00B                         | C00I | 1.501(2)   |
| C16      | C17 | 1.417(6) | C00C                         | C00P | 1.498(2)   |
| C17      | C18 | 1.371(6) | C00D                         | C00J | 1.415(3)   |
| C17      | C19 | 1.484(6) | C00E                         | C00F | 1.374(3)   |
| C19      | O20 | 1.286(5) | C00E                         | C00H | 1.406(3)   |
| C19      | O21 | 1.250(6) | C00G                         | C00N | 1.384(3)   |
|          |     |          | C00H                         | C00K | 1.421(3)   |
|          |     |          | C00J                         | C00M | 1.425(3)   |
|          |     |          | C00J                         | C00S | 1.423(3)   |
|          |     |          | C00K                         | C00M | 1.361(3)   |
|          |     |          | C00L                         | C00Q | 1.404(3)   |
|          |     |          | C00L                         | C00R | 1.426(3)   |
|          |     |          | C00N                         | C00O | 1.394(3)   |
|          |     |          | C00O                         | C00Q | 1.372(3)   |
|          |     |          | C00R                         | C00S | 1.363(4)   |

**Table S2.** Selected bond distances (Å) for compounds **2** and **TMTTF-(2)<sub>2</sub>**.

| (TMTTF) <sub>2</sub> ([4]heliceneSO <sub>3</sub> ) <sub>2</sub> |     |           |     |     |           |     |     |           |
|-----------------------------------------------------------------|-----|-----------|-----|-----|-----------|-----|-----|-----------|
| O1                                                              | S1  | 1.448(7)  | C5  | C7  | 1.412(19) | C26 | C27 | 1.473(14) |
| S1                                                              | O2  | 1.443(7)  | C7  | C8  | 1.272(17) | C27 | C28 | 1.375(16) |
| S1                                                              | O3  | 1.452(8)  | C18 | C17 | 1.360(18) | C27 | C29 | 1.424(16) |
| S1                                                              | C15 | 1.788(11) | C2  | C1  | 1.356(17) | C28 | C32 | 1.446(13) |
| S2                                                              | O4  | 1.452(8)  | S4  | C39 | 1.751(9)  | C29 | C30 | 1.336(15) |
| S2                                                              | O5  | 1.449(7)  | S4  | C41 | 1.704(9)  | C30 | C31 | 1.459(13) |
| S2                                                              | O6  | 1.441(8)  | S5  | C42 | 1.681(9)  | C31 | C32 | 1.417(13) |
| S2                                                              | C33 | 1.773(9)  | S5  | C43 | 1.739(9)  | C31 | C33 | 1.430(13) |
| S3                                                              | C38 | 1.736(9)  | S6  | C42 | 1.714(8)  | C32 | C36 | 1.429(14) |
| S3                                                              | C41 | 1.721(9)  | S6  | C44 | 1.719(9)  | C33 | C34 | 1.379(13) |
| C6                                                              | C10 | 1.465(13) | S7  | C48 | 1.739(10) | C34 | C35 | 1.404(12) |
| C6                                                              | C5  | 1.423(15) | S7  | C51 | 1.717(9)  | C35 | C36 | 1.362(14) |
| C6                                                              | C1  | 1.372(16) | S8  | C49 | 1.730(9)  | C37 | C38 | 1.500(12) |
| C12                                                             | C13 | 1.414(13) | S8  | C51 | 1.727(9)  | C38 | C39 | 1.343(13) |
| C12                                                             | C11 | 1.362(13) | S9  | C52 | 1.723(10) | C39 | C40 | 1.494(13) |
| C10                                                             | C14 | 1.437(13) | S9  | C53 | 1.750(9)  | C41 | C42 | 1.426(11) |
| C10                                                             | C9  | 1.405(13) | S10 | C52 | 1.721(9)  | C43 | C44 | 1.347(13) |
| C13                                                             | C15 | 1.438(13) | S10 | C54 | 1.752(10) | C43 | C46 | 1.510(12) |
| C13                                                             | C14 | 1.444(13) | C19 | C20 | 1.388(17) | C44 | C45 | 1.509(12) |
| C15                                                             | C16 | 1.381(15) | C19 | C24 | 1.41(2)   | C47 | C48 | 1.513(13) |
| C16                                                             | C17 | 1.397(18) | C20 | C21 | 1.40(2)   | C48 | C49 | 1.342(14) |
| C11                                                             | C9  | 1.401(13) | C21 | C22 | 1.34(2)   | C49 | C50 | 1.510(12) |
| C14                                                             | C18 | 1.401(15) | C22 | C23 | 1.28(2)   | C51 | C52 | 1.393(12) |
| C9                                                              | C8  | 1.433(13) | C23 | C24 | 1.53(2)   | C53 | C54 | 1.340(14) |
| C3                                                              | C4  | 1.41(2)   | C23 | C25 | 1.42(2)   | C54 | C55 | 1.504(13) |
| C3                                                              | C2  | 1.34(2)   | C24 | C28 | 1.451(14) |     |     |           |
| C4                                                              | C5  | 1.404(18) | C25 | C26 | 1.40(2)   |     |     |           |

**Table S3.** Selected bond distances (Å) for compound (TMTTF)<sub>2</sub>([4]heliceneSO<sub>3</sub>)<sub>2</sub>.

---

**(TMTSF)<sub>5</sub>([4]heliceneSO<sub>3</sub>)<sub>5</sub>**

|      |      |           |      |      |           |      |      |           |      |      |           |
|------|------|-----------|------|------|-----------|------|------|-----------|------|------|-----------|
| C1C  | C2C  | 1.378(11) | S1E  | O2E  | 1.410(11) | Se4B | C20B | 1.876(8)  | C13E | C15E | 1.392(7)  |
| C1C  | C6C  | 1.407(11) | S1E  | O3E  | 1.472(11) | Se4B | C23B | 1.860(7)  | C13D | C17D | 1.413(11) |
| C2C  | C3C  | 1.376(12) | S1E  | C15E | 1.759(11) | Se4E | C32E | 1.880(7)  | C13B | C14B | 1.396(10) |
| C3C  | C4C  | 1.378(13) | Se1E | C35E | 1.889(7)  | Se4E | C34E | 1.861(7)  | C13B | C15B | 1.437(10) |
| C4C  | C5C  | 1.411(12) | Se1E | C36E | 1.895(8)  | C5A  | C6A  | 1.416(10) | C15A | C16A | 1.384(10) |
| C5C  | C6C  | 1.420(10) | C26C | C25C | 1.510(11) | C5A  | C7A  | 1.426(11) | C14E | C18E | 1.420(9)  |
| C5C  | C7C  | 1.424(13) | C26C | C27C | 1.348(11) | C6A  | C10A | 1.462(11) | C14E | C28E | 1.411(10) |
| C6C  | C10C | 1.466(10) | C26C | Se2C | 1.887(7)  | C5E  | C6E  | 1.388(14) | C14D | C15D | 1.374(11) |
| C7C  | C8C  | 1.360(13) | C24C | C23C | 1.353(10) | C5E  | C7E  | 1.444(16) | C14B | C18B | 1.437(9)  |
| C8C  | C9C  | 1.429(11) | C24C | Se2C | 1.863(7)  | C5E  | C4E  | 1.397(10) | C16A | C17A | 1.396(11) |
| C9C  | C11C | 1.424(11) | C23C | Se3C | 1.859(6)  | C5E  | C24E | 1.405(10) | C15D | C16D | 1.400(11) |
| C9C  | C10C | 1.397(11) | C23C | Se4C | 1.889(6)  | C5D  | C9D  | 1.466(11) | C15B | C16B | 1.375(10) |
| C14C | C13C | 1.446(10) | C22C | C21C | 1.503(10) | C5D  | C19D | 1.413(12) | C17A | C18A | 1.351(10) |
| C14C | C10C | 1.450(10) | C21C | C20C | 1.327(10) | C5B  | C6B  | 1.421(10) | C16D | C17D | 1.378(10) |
| C14C | C18C | 1.409(10) | C21C | Se3C | 1.878(7)  | C5B  | C7B  | 1.428(11) | C16B | C17B | 1.398(12) |
| C13C | C12C | 1.422(10) | C20C | Se4C | 1.892(6)  | C7A  | C8A  | 1.353(11) | C18B | C17B | 1.364(11) |
| C13C | C15C | 1.432(10) | N1H  | C1H  | 1.144(15) | C6E  | C10E | 1.445(13) | C19B | C20B | 1.500(11) |
| C12C | C11C | 1.347(11) | C1H  | C2H  | 1.456(16) | C6E  | C1E  | 1.409(9)  | C20A | C21A | 1.325(11) |
| C16C | C15C | 1.381(11) | C1G  | N1G  | 1.149(15) | C6E  | C21E | 1.422(10) | C20A | C19A | 1.510(12) |
| C16C | C17C | 1.407(11) | C1G  | C2G  | 1.431(15) | C6D  | C7D  | 1.339(13) | C21A | C22A | 1.497(12) |
| C15C | S1C  | 1.781(8)  | C28C | C27C | 1.504(10) | C6B  | C10B | 1.470(10) | C20D | C21D | 1.354(11) |
| C17C | C18C | 1.370(10) | C2A  | C3A  | 1.394(13) | C8A  | C9A  | 1.413(10) | C20D | C18D | 1.504(10) |
| S1A  | O1A  | 1.457(5)  | Se2A | C24A | 1.864(8)  | C7E  | C8E  | 1.374(17) | C20B | C21B | 1.343(12) |
| S1A  | O2A  | 1.449(5)  | Se2A | C26A | 1.890(7)  | C7D  | C8D  | 1.439(10) | C21D | C22D | 1.506(10) |
| S1A  | O3A  | 1.454(5)  | C2B  | C3B  | 1.394(12) | C7B  | C8B  | 1.359(11) | C21B | C22B | 1.502(11) |
| S1A  | C15A | 1.797(7)  | Se2B | C24B | 1.871(7)  | C9A  | C10A | 1.417(10) | C23A | C24A | 1.361(11) |
| Se1A | C24A | 1.868(7)  | Se2B | C27B | 1.879(7)  | C9A  | C11A | 1.426(11) | C23D | C24D | 1.390(10) |
| Se1A | C27A | 1.874(8)  | Se2E | C35E | 1.853(8)  | C8E  | C9E  | 1.421(15) | C23B | C24B | 1.374(11) |
| C19C | C20C | 1.529(9)  | Se2E | C38E | 1.883(8)  | C8D  | C9D  | 1.411(11) | C25A | C26A | 1.495(11) |
| C1A  | C2A  | 1.376(11) | C2D  | C3D  | 1.349(15) | C8D  | C10D | 1.427(11) | C26A | C27A | 1.340(11) |
| C1A  | C6A  | 1.420(11) | Se2D | C24D | 1.854(7)  | C8B  | C9B  | 1.427(10) | C25D | C26D | 1.493(11) |
| S1B  | O1B  | 1.453(6)  | Se2D | C26D | 1.879(7)  | C10A | C14A | 1.426(10) | C25B | C26B | 1.513(10) |
| S1B  | O2B  | 1.453(6)  | C2I  | C1I  | 1.45(3)   | C9E  | C10E | 1.462(14) | C27A | C28A | 1.497(11) |
| S1B  | O3B  | 1.451(6)  | C1I  | N1I  | 1.17(3)   | C9E  | C11E | 1.432(15) | C26D | C27D | 1.345(11) |
| S1B  | C15B | 1.786(7)  | Se3A | C20A | 1.893(8)  | C9D  | C13D | 1.452(9)  | C26B | C27B | 1.341(11) |
| Se1B | C24B | 1.852(7)  | Se3A | C23A | 1.872(7)  | C9B  | C10B | 1.409(9)  | C27D | C28D | 1.518(10) |
| Se1B | C26B | 1.871(8)  | C3A  | C4A  | 1.365(12) | C9B  | C11B | 1.430(10) | C28B | C27B | 1.504(11) |
| C1B  | C2B  | 1.364(11) | C3D  | C4D  | 1.424(12) | C11A | C12A | 1.344(11) | C30E | C31E | 1.512(11) |
| C1B  | C6B  | 1.418(10) | Se3D | C20D | 1.873(7)  | C10E | C14E | 1.380(13) | C31E | C32E | 1.357(11) |
| C1D  | C2D  | 1.397(12) | Se3D | C23D | 1.856(7)  | C10D | C11D | 1.357(10) | C32E | C33E | 1.522(12) |

|      |      |           |      |      |           |      |      |           |      |      |           |
|------|------|-----------|------|------|-----------|------|------|-----------|------|------|-----------|
| C1D  | C19D | 1.388(11) | C3B  | C4B  | 1.346(12) | C10B | C14B | 1.457(10) | C34E | C35E | 1.363(11) |
| S1D  | O1D  | 1.461(5)  | Se3B | C21B | 1.879(8)  | C12A | C13A | 1.439(10) | C36E | C37E | 1.530(11) |
| S1D  | O2D  | 1.460(5)  | Se3B | C23B | 1.862(7)  | C11E | C12E | 1.329(16) | C36E | C38E | 1.317(12) |
| S1D  | O3D  | 1.451(5)  | Se3E | C31E | 1.865(8)  | C11D | C12D | 1.432(10) | C38E | C39E | 1.517(12) |
| S1D  | C14D | 1.776(8)  | Se3E | C34E | 1.863(7)  | C11B | C12B | 1.348(10) | C15E | C16E | 1.403(9)  |
| Se1D | C24D | 1.859(7)  | Se4A | C21A | 1.874(8)  | C13A | C14A | 1.436(10) | C15E | S1F  | 1.748(17) |
| Se1D | C27D | 1.884(7)  | Se4A | C23A | 1.863(7)  | C13A | C15A | 1.429(9)  | C16E | C17E | 1.54(3)   |
| S1C  | O1C  | 1.458(5)  | C4A  | C5A  | 1.416(11) | C12E | C13E | 1.444(14) | C16E | C27E | 1.34(3)   |
| S1C  | O2C  | 1.449(6)  | C4D  | C5D  | 1.420(10) | C12D | C13D | 1.419(10) | C4E  | C3E  | 1.397(9)  |
| S1C  | O3C  | 1.465(6)  | C4D  | C6D  | 1.417(13) | C12D | C14D | 1.432(9)  | C3E  | C2E  | 1.417(17) |
| Se1C | C24C | 1.865(7)  | Se4D | C21D | 1.876(7)  | C12B | C13B | 1.426(9)  | C2E  | C1E  | 1.329(17) |
| Se1C | C27C | 1.863(7)  | Se4D | C23D | 1.851(7)  | C14A | C18A | 1.416(9)  | C17E | C18E | 1.329(17) |
| S1E  | O1E  | 1.433(9)  | C4B  | C5B  | 1.417(11) | C13E | C14E | 1.440(12) | C24E | C23E | 1.403(7)  |
| C23E | C22E | 1.406(9)  | O2F  | S1F  | 1.430(14) | S1G  | C12G | 2.046(15) | S1H  | C11H | 2.051(14) |
| C22E | C21E | 1.333(17) | S1F  | O3F  | 1.461(15) | S1G  | C13G | 1.794(14) | S1H  | C14H | 1.724(16) |
| C27E | C28E | 1.326(18) | S1G  | O1G  | 1.365(14) | S1H  | O2H  | 1.340(15) | C11H | O5G  | 1.80(5)   |
| O1F  | S1F  | 1.442(14) |      |      |           |      |      |           |      |      |           |

**Table S4.** Selected bond distances (Å) for compound (TMTSF)<sub>5</sub>[[4]heliceneSO<sub>3</sub>]<sub>5</sub>.



| <b>(BEDT-TTF)<sub>2</sub>([4]heliceneSO<sub>3</sub>)</b> |      |           |      |      |           |      |      |           |
|----------------------------------------------------------|------|-----------|------|------|-----------|------|------|-----------|
| O19A                                                     | S22A | 1.462(10) | C17  | C18  | 1.378(12) | S10B | Cl2B | 2.184(4)  |
| O20A                                                     | S22A | 1.472(10) | S1A  | C2A' | 1.71(3)   | O1C  | S10C | 1.494(14) |
| O21A                                                     | S22A | 1.482(9)  | S1A  | C2A  | 1.87(3)   | S10C | Cl2C | 2.132(4)  |
| S22A                                                     | C15A | 1.767(11) | S1A  | C3A  | 1.743(6)  | S10C | Cl3C | 2.184(4)  |
| C15A                                                     | C16A | 1.390(12) | S2A  | C1A  | 1.906(19) | C7A  | C8A  | 1.507(18) |
| C15A                                                     | C13  | 1.351(12) | S2A  | C1A' | 1.70(3)   | C7A' | C8A' | 1.489(19) |
| C16A                                                     | C17  | 1.451(12) | S2A  | C4A  | 1.739(6)  | S1B  | C2B  | 1.807(12) |
| S22B                                                     | O19B | 1.465(13) | S3A  | C3A  | 1.747(6)  | S1B  | C2B' | 1.737(12) |
| S22B                                                     | O20B | 1.464(13) | S3A  | C5A  | 1.730(6)  | S1B  | C3B  | 1.743(6)  |
| S22B                                                     | O21B | 1.472(14) | S4A  | C4A  | 1.746(6)  | S2B  | C1B  | 1.768(10) |
| S22B                                                     | C15B | 1.799(15) | S4A  | C5A  | 1.737(6)  | S2B  | C1B' | 1.800(14) |
| C15B                                                     | C16B | 1.438(16) | S5A  | C6A  | 1.732(6)  | S2B  | C4B  | 1.734(6)  |
| C15B                                                     | C13  | 1.491(14) | S5A  | C9A  | 1.747(6)  | S3B  | C3B  | 1.744(6)  |
| C16B                                                     | C17  | 1.363(14) | S6A  | C6A  | 1.734(6)  | S3B  | C5B  | 1.723(6)  |
| C1                                                       | C2   | 1.369(10) | S6A  | C10A | 1.757(6)  | S4B  | C4B  | 1.743(6)  |
| C1                                                       | C6   | 1.411(10) | S7A  | C9A  | 1.735(6)  | S4B  | C5B  | 1.722(6)  |
| C2                                                       | C3   | 1.387(11) | S7A  | C7A  | 1.790(14) | S5B  | C6B  | 1.723(5)  |
| C3                                                       | C4   | 1.374(13) | S7A  | C7A' | 1.804(12) | S5B  | C9B  | 1.737(6)  |
| C4                                                       | C5   | 1.404(12) | S8A  | C8A  | 1.841(11) | S6B  | C6B  | 1.722(6)  |
| C5                                                       | C6   | 1.428(10) | S8A  | C8A' | 1.776(13) | S6B  | C10B | 1.733(6)  |
| C5                                                       | C7   | 1.416(11) | S8A  | C10A | 1.740(6)  | S7B  | C9B  | 1.746(6)  |
| C6                                                       | C10  | 1.437(10) | C1A  | C2A' | 1.59(3)   | S7B  | C7B  | 1.789(10) |
| C10                                                      | C9   | 1.394(11) | C1A' | C2A  | 1.40(3)   | S8B  | C10B | 1.743(6)  |
| C10                                                      | C14  | 1.452(11) | C3A  | C4A  | 1.331(9)  | S8B  | C8B  | 1.769(9)  |
| C8                                                       | C9   | 1.433(14) | C5A  | C6A  | 1.355(8)  | C1B  | C2B  | 1.539(16) |
| C8                                                       | C7   | 1.340(14) | C9A  | C10A | 1.344(9)  | C1B' | C2B' | 1.522(18) |
| C9                                                       | C11  | 1.415(14) | O1A  | S10A | 1.577(12) | C3B  | C4B  | 1.349(9)  |
| C11                                                      | C12  | 1.343(18) | S10A | Cl2A | 2.132(4)  | C5B  | C6B  | 1.370(8)  |
| C12                                                      | C13  | 1.467(16) | S10A | Cl3A | 2.053(5)  | C9B  | C10B | 1.345(9)  |
| C13                                                      | C14  | 1.430(10) | O1B  | S10B | 1.494(14) | C7B  | C8B  | 1.446(15) |
| C14                                                      | C18  | 1.391(13) | S10B | Cl3B | 2.053(5)  |      |      |           |

**Table S5.** Selected bond distances (Å) for compound **(BEDT-TTF)<sub>2</sub>([4]heliceneSO<sub>3</sub>)**.

## References

- 1 G. Sheldrick, *Acta Crystallogr. Sect. A*, 2008, **64**, 112–122.
- 2 G. M. Sheldrick, *Acta Crystallogr. Sect. Found. Adv.*, 2015, **71**, 3–8.
- 3 C. B. Hübschle, G. M. Sheldrick and B. Dittrich, *J. Appl. Crystallogr.*, 2011, **44**, 1281–1284.
- 4 O. V. Dolomanov, L. J. Bourhis, R. J. Gildea, J. a. K. Howard and H. Puschmann, *J. Appl. Crystallogr.*, 2009, **42**, 339–341.
